# Supplementary material
Source: HighWire-hosted journal article supplement (https://qualitysafety.bmj.com/highwire/filestream/164650/field_highwire_adjunct_files/3/bmjqs-2024-017476supp004_data_supplement.pdf)
Supplement: bmjqs-2024-017476supp004_data_supplement.pdf [file bmjqs-2024-017476supp004_data_supplement.pdf]

**Supplemental Table S4. Completeness, accuracy, and readability scores for chatbot answers to patient questions regarding the top 50 most prescribed drugs in the US outpatient market.**

|                                                                                |        | Statements<br>reference | Statements<br>chatbot | Completeness<br>[%] | Accuracy<br>[%] | Readability |
|--------------------------------------------------------------------------------|--------|-------------------------|-----------------------|---------------------|-----------------|-------------|
| What is [drug]<br>used for?                                                    | Median | 3.0                     | 3.0                   | 100.0               | 100.0           | 33.2        |
|                                                                                | IQR    | 2.0-3.0                 | 3.0-4.0               | 75.0-100.0          | 100.0-100.0     | 21.6-48.4   |
|                                                                                | Mean   | 2.9                     | 3.7                   | 88.3                | 99.0            | 33.6        |
|                                                                                | SD     | 1.9                     | 1.7                   | 20.8                | 5.00            | 16.9        |
| How does<br>[drug] work?                                                       | Median | 1.0                     | 1.0                   | 100.00              | 100.0           | 34.0        |
|                                                                                | IQR    | 1.0-1.0                 | 1.0-2.0               | 100.0-100.0         | 100.0-100.0     | 23.1-48.4   |
|                                                                                | Mean   | 1.0                     | 1.6                   | 98.9                | 98.9            | 35.1        |
|                                                                                | SD     | 0.4                     | 1.0                   | 7.4                 | 7.4             | 16.9        |
| What do I have<br>to consider<br>when taking<br>[drug]?                        | Median | 12.0                    | 4.0                   | 20.0                | 100.0           | 48.7        |
|                                                                                | IQR    | 10.8-13.0               | 3.0-5.0               | 15.4-30.9           | 75.0-100.0      | 39.3-56.1   |
|                                                                                | Mean   | 11.9                    | 4.4                   | 22.7                | 88.8            | 46.9        |
|                                                                                | SD     | 2.1                     | 1.5                   | 11.5                | 16.4            | 13.4        |
| Can I take<br>[drug] together<br>with food?                                    | Median | 1.0                     | 1.0                   | 100.0               | 100.0           | 58.6        |
|                                                                                | IQR    | 1.0-1.0                 | 1.0-2.0               | 100.0-100.0         | 100.0-100.0     | 46.8-74.1   |
|                                                                                | Mean   | 1.0                     | 1.4                   | 98.0                | 94.0            | 59.2        |
|                                                                                | SD     | 0.2                     | 0.7                   | 9.9                 | 21.8            | 16.3        |
| Can I drink<br>alcohol while<br>on [drug]?                                     | Median | 1.0                     | 1.0                   | 100.0               | 100.0           | 40.2        |
|                                                                                | IQR    | 1.0-1.0                 | 1.0-1.0               | 100.0-100.0         | 50.0-100.0      | 27.9-46.5   |
|                                                                                | Mean   | 1.0                     | 1.1                   | 100.0               | 78.0            | 36.1        |
|                                                                                | SD     | 0.0                     | 0.3                   | 0.0                 | 35.2            | 14.4        |
| Are there any<br>other drugs<br>that should not<br>be combined<br>with [drug]? | Median | 6.0                     | 4.0                   | 42.9                | 100.0           | 31.6        |
|                                                                                | IQR    | 3.8-9.3                 | 2.0-6.0               | 19.2-60.0           | 75.0-100.0      | 16.6-39.2   |
|                                                                                | Mean   | 6.3                     | 4.7                   | 42.6                | 85.0            | 27.6        |
|                                                                                | SD     | 3.7                     | 3.4                   | 29.9                | 22.6            | 16.4        |
| What are the<br>most common<br>side effects of<br>[drug]?                      | Median | 4.5                     | 7.0                   | 75.0                | 100.0           | 38.8        |
|                                                                                | IQR    | 4.0-7.0                 | 5.0-8.5               | 50.0-100.0          | 100.0-100.0     | 22.5-48.4   |
|                                                                                | Mean   | 5.4                     | 7.7                   | 71.34               | 98.8            | 36.7        |
|                                                                                | SD     | 2.8                     | 3.3                   | 25.0                | 4.5             | 16.4        |
| What are the<br>most serious<br>side effects of<br>[drug]?                     | Median | 8.0                     | 7.0                   | 50.0                | 92.3            | 38.1        |
|                                                                                | IQR    | 5.0-11.0                | 5.0-9.0               | 32.7-60.0           | 66.7-100.0      | 23.0-46.8   |
|                                                                                | Mean   | 8.1                     | 7.7                   | 46.6                | 83.9            | 34.0        |
|                                                                                | SD     | 3.8                     | 3.8                   | 16.8                | 19.6            | 15.6        |
| Can [drug] be<br>used in<br>pregnancy?                                         | Median | 1.0                     | 1.0                   | 100.0               | 100.0           | 38.7        |
|                                                                                | IQR    | 1.0-1.0                 | 1.0-1.0               | 100.0-100.0         | 100.0-100.0     | 28.2-46.0   |
|                                                                                | Mean   | 1.0                     | 1.1                   | 100.0               | 89.0            | 37.2        |
|                                                                                | SD     | 0.0                     | 0.2                   | 0.0                 | 23.2            | 12.2        |
| Can [drug] be<br>used in renal<br>failure?                                     | Median | 1.0                     | 1.0                   | 100.0               | 50.0            | 29.1        |
|                                                                                | IQR    | 1.0-1.0                 | 1.0-1.0               | 100.0-100.0         | 50.0-100.0      | 17.0-35.8   |
|                                                                                | Mean   | 1.0                     | 1.2                   | 100.0               | 73.0            | 26.5        |
|                                                                                | SD     | 0.0                     | 0.7                   | 0.0                 | 27.1            | 13.9        |

Abbreviations: IQR, interquartile range; SD, standard deviation.
